# Supplementary material for: Steam-assisted transformation of natural kaolin to hierarchical ZSM-11 using tetrabutylphosphonium hydroxide as structure-directing agent: synthesis, structural characterization and catalytic performance in the methanol-to-aromatics reaction
Source: Royal Society of Chemistry journal article supplement (doi:10.1039/c7ra03141f), 2017-01-01
Supplement: c7ra03141f1.pdf [file c7ra03141f1.pdf]

1 **Steam-Assisted Transformation of Natural Kaolin to Hierarchical**  
2 **ZSM-11 using Tetrabutylphosphonium Hydroxide as Structure**  
3 **Directing Agent: Synthesis, Structural characterization and Catalytic**  
4 **Performance in Methanol-to-Aromatics Reaction**

5 *Zhenhao Wei,<sup>a</sup> Kake Zhu,<sup>a</sup> Lanyu Xing,<sup>a</sup> Fan Yang,<sup>a</sup> Yunsheng Li,<sup>a</sup> Yarong Xu,<sup>b</sup> Xuedong Zhu<sup>a\*</sup>*

6 <sup>a</sup>UNILAB, State Key Lab of Chemical Engineering, School of Chemical Engineering, East China  
7 University of Science and Technology, 130 Meilong Road, Shanghai 200237, China

8 <sup>b</sup>Research Institute of Urumchi Petrochemical Company, PetroChina Company Limited, Urumchi  
9 830019, China

10 *\*Corresponding author: Tel: 86-21-64252386; Fax: 86-21-64252386; E-mail:*  
11 *xdzhu@ecust.edu.cn*

12 **Supplementary Methods**

13 ZSM-5/11 intergrowth zeolite was obtained using the same procedure of synthesizing ZSM-  
14 11-K with the aid of the tetrabutylammonium hydroxide (TBAOH, 40 wt%, Aladdin) as SDA  
15 instead of TBPOH.

16 **Supplementary Figures and Tables**

17

18

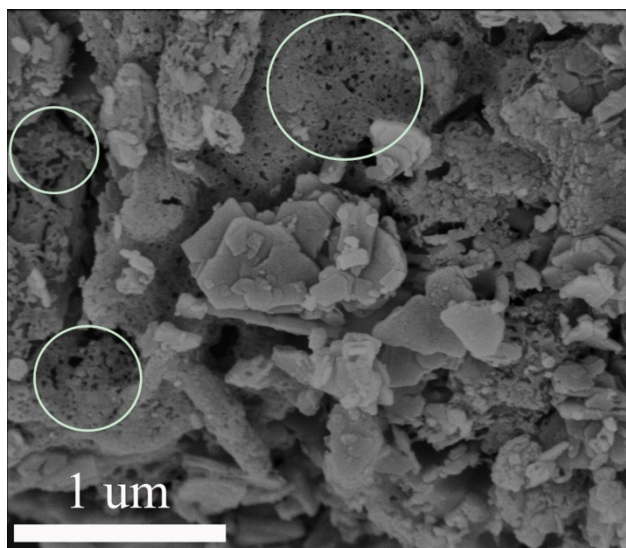

19

Fig. S1 SEM images of LMK

20

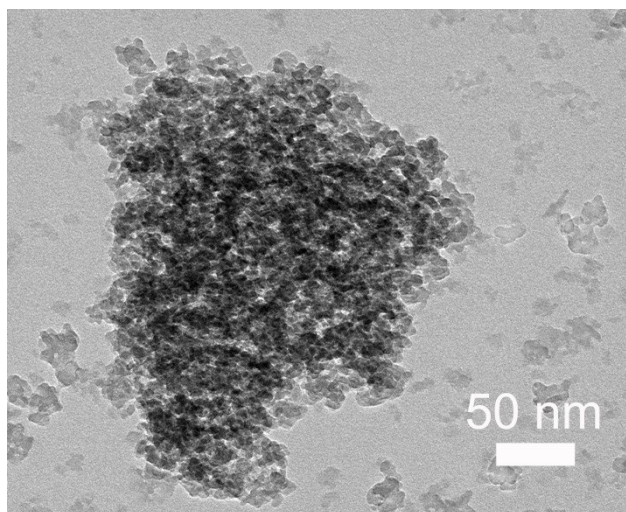

21

Fig. S2 TEM images of ZSM-11-K

22

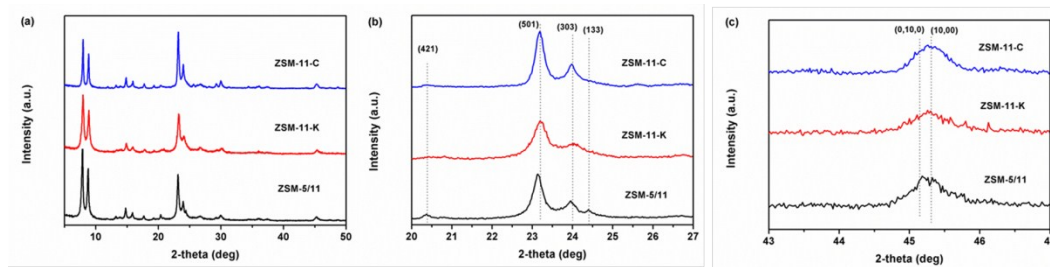

23

24 Fig. S3 (a) XRD pattern, (b) enlarged  $2\theta$  region from  $20^\circ$ - $27^\circ$ , and (c) enlarged  $2\theta$  region  
 25 from  $43^\circ$ - $47^\circ$ .

26 Table S1 Chemical composition of kaolin and LMK<sup>a</sup>

| Composition (wt%) | SiO <sub>2</sub> | Al <sub>2</sub> O <sub>3</sub> | Na <sub>2</sub> O | K <sub>2</sub> O | Fe <sub>2</sub> O <sub>3</sub> |
|-------------------|------------------|--------------------------------|-------------------|------------------|--------------------------------|
| kaolin            | 55.3             | 42.5                           | 0.09              | 0.42             | 0.70                           |
| LMK               | 95.3             | 3.4                            | 0.06              | 0.24             | 0.09                           |

27 <sup>a</sup>The data were determined by XRF with a Shimadzu Model XRF-1800 instrument.

28 Besides the characteristic diffraction peaks of ZSM-11, ZSM-5/11 exhibited the (421), (133)  
 29 and (0,10,0) peaks belong to ZSM-5 (Fig. S3). It suggested that ZSM-5/11 was intergrowths of  
 30 ZSM-11 and ZSM-5.<sup>1, 2</sup> This should be attributed to the Na<sup>+</sup> in LMK (Table S1). As the  
 31 compresence of Na<sup>+</sup> could direct the formation of competing ZSM-5 phase, resultantly, a ZSM-  
 32 11/ZSM-5 intergrowth is often obtained.

33 Table S2 Physical properties of kaolin and LMK.

| Sample | Si/Al <sup>a</sup> | $S_{\text{BET}}^{\text{b}}$<br>(m <sup>2</sup> /g) | $S_{\text{meso}}^{\text{c}}$<br>(m <sup>2</sup> /g) | $V_{\text{total}}^{\text{d}}$<br>(cm <sup>3</sup> /g) | $V_{\text{micro}}^{\text{c}}$<br>(cm <sup>3</sup> /g) | $V_{\text{meso}}^{\text{e}}$<br>(cm <sup>3</sup> /g) |
|--------|--------------------|----------------------------------------------------|-----------------------------------------------------|-------------------------------------------------------|-------------------------------------------------------|------------------------------------------------------|
| kaolin | 1.1                | 29                                                 | -                                                   | 0.16                                                  | -                                                     | -                                                    |
| LMK    | 23.5               | 365                                                | 325                                                 | 0.47                                                  | 0.03                                                  | 0.44                                                 |

34 <sup>a</sup> Determined by XRF with a Shimadzu Model XRF-1800 instrument. <sup>b</sup> BET method. <sup>c</sup>  $t$ -plot  
 35 method. <sup>d</sup> Volume adsorbed at  $p/p_0 = 0.99$ . <sup>e</sup>  $V_{\text{meso}} = V_{\text{total}} - V_{\text{micro}}$ .

36 Kaolin showed the low  $S_{\text{BET}}$  of 29 m<sup>2</sup>/g and a Si/Al ratio close to 1, which was consistent  
 37 with several research groups.<sup>3-5</sup> The Si/Al ratio was increased from 1.1 to 23.5 for kaolin by acid  
 38 leaching. Moreover, the LMK exhibited high  $S_{\text{BET}}$  of 365 m<sup>2</sup>/g and rich  $V_{\text{meso}}$  of 0.44 cm<sup>3</sup>/g.  
 39 Notably, it has been proposed that acid leaching mainly resulted in dealumination of kaolin and  
 40 hence created mesopores on kaolin.<sup>6,7</sup>

41

Table S3 Acid properties of ZSM-11-C and ZSM-11-K.

| Sample   | Acidity by strength <sup>a</sup> ( $\mu\text{mol}/\text{m}^2$ ) |       |       | Acidity by type <sup>b</sup> ( $\mu\text{mol}/\text{m}^2$ ) |       |       |
|----------|-----------------------------------------------------------------|-------|-------|-------------------------------------------------------------|-------|-------|
|          | SAS                                                             | WAS   | Total | LAS                                                         | BAS   | Total |
| ZSM-11-C | 2.144                                                           | 1.619 | 3.763 | 0.800                                                       | 1.146 | 1.946 |
| ZSM-11-K | 1.320                                                           | 1.379 | 2.708 | 0.502                                                       | 1.120 | 1.622 |

42 <sup>a</sup> The concentration of strong acid sites ( $C_{\text{SAS}}$ ) and weak acid sites ( $C_{\text{WAS}}$ ) determined by  $\text{NH}_3$ -  
 43 TPD.

44 <sup>b</sup> The concentration of Lewis acid sites ( $C_{\text{LAS}}$ ) and Brønsted acid sites ( $C_{\text{BAS}}$ ) calculated by Py-IR  
 45 after evacuation at 350 °C.

## 46 References

- 47 1 M. Conte, B. Xu, T. E. Davies, J. K. Bartley, A. F. Carley, S. H. Taylor, K. Khalid and G. J.  
 48 Hutchings, *Micropor. Mesopor. Mat.*, 2012, **164**, 207-213.
- 49 2 G. A. Jablonski, L. B. Sand and J. A. Gard, *Zeolites*, 1986, **6**, 396-402.
- 50 3 Z. Shu, T. Li, J. Zhou, Y. Chen, Z. Sheng, Y. Wang and X. Yuan, *Appl. Clay Sci.*, 2016, **123**,  
 51 76-82.
- 52 4 F. Pan, X. Lu, Y. Wang, S. Chen, T. Wang and Y. Yan, *Mater. Lett.*, 2014, **115**, 5-8.
- 53 5 E. Mohiuddin, Y. M. Isa, M. M. Mdleleni, N. Sincadu, D. Key and T. Tshabalala, *Appl. Clay*  
 54 *Sci.*, 2016, **119**, 213-221.
- 55 6 W. Aguilar-Mamani, G. García, J. Hedlund and J. Mouzon, *SpringerPlus*, 2014, **3**, 292.
- 56 7 S. M. Holmes, S. H. Khoo and A. S. Kovo, *Green Chem.*, 2011, **13**, 1152-1154.
